# Supplementary material for: Ubiquitin-independent proteosomal degradation of myelin basic protein contributes to development of neurodegenerative autoimmunity
Source: PubMed Central journal article supplement — FASEB J. 2015 Jan 29;29(5):1901–13. doi: 10.1096/fj.14-259333 (PMC4415016; doi:10.1096/fj.14-259333), 2015-01-29
Supplement: supp_fj.14-259333_Supplemental_Figure2.pdf [file supp_fj.14-259333_Supplemental_Figure2.pdf]

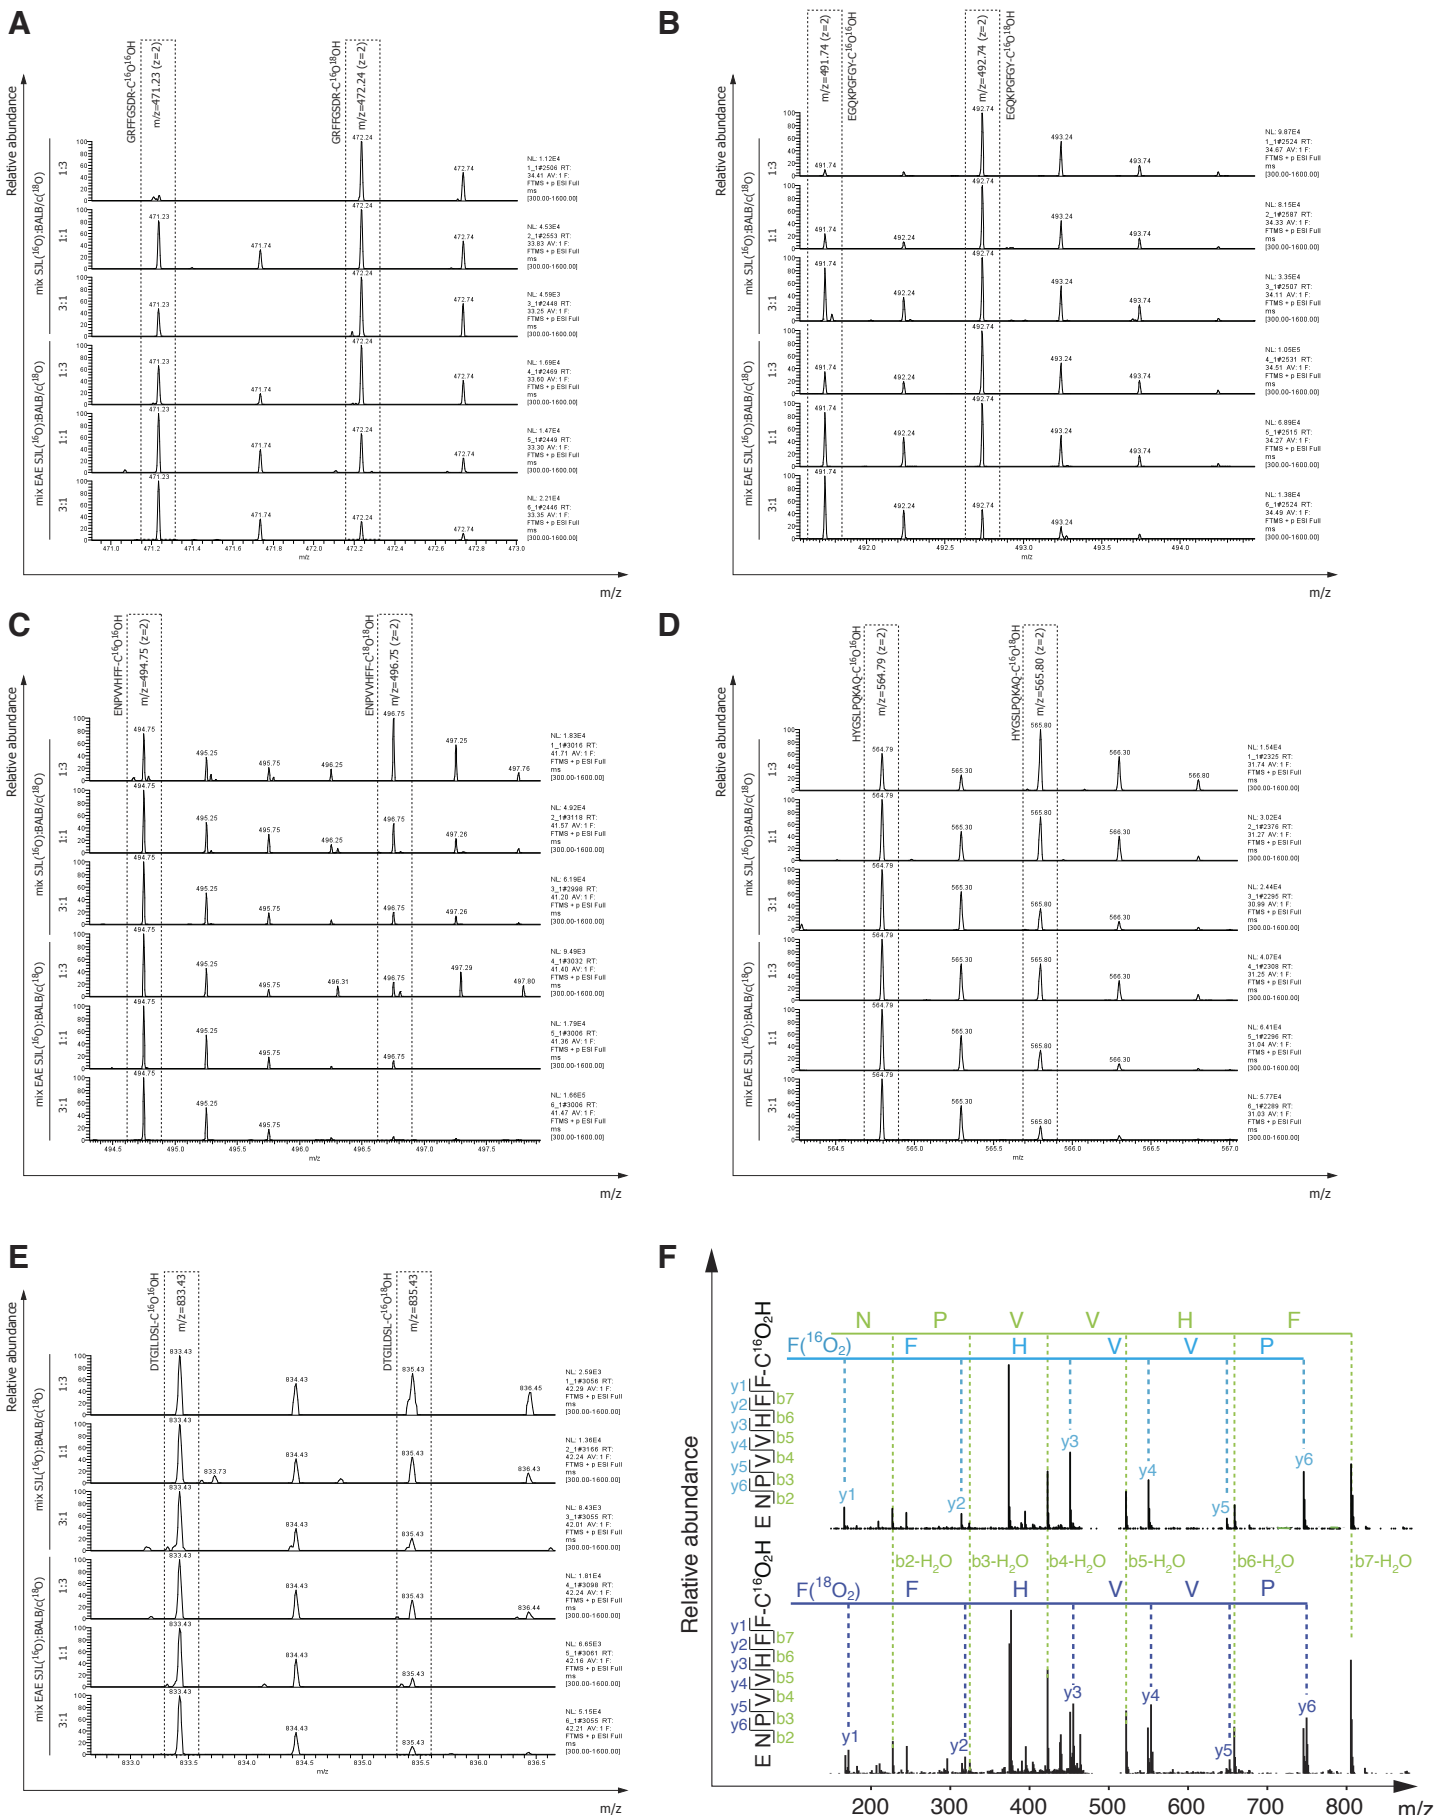

**Figure S2 | (A-E)** LC-ESI-MS analysis of mixed MBP hydrolyzates by various proteasomes (BALB/c – SJL and BALB/c – EAE SJL in pairs in different molar ratio). Please note that BALB/c samples were obtained in H<sub>2</sub><sup>18</sup>O. **(F)** MS-MS spectra of the ENPVVHFF peptide with <sup>16</sup>O<sub>2</sub>/<sup>18</sup>O<sub>2</sub> atoms on its C-terminus incorporated during proteasomal hydrolysis.
