# Supplementary material for: Ubiquitin-independent proteosomal degradation of myelin basic protein contributes to development of neurodegenerative autoimmunity
Source: PubMed Central journal article supplement — FASEB J. 2015 Jan 29;29(5):1901–13. doi: 10.1096/fj.14-259333 (PMC4415016; doi:10.1096/fj.14-259333), 2015-01-29
Supplement: supp_fj.14-259333_Supplemental_Figure4.pdf [file supp_fj.14-259333_Supplemental_Figure4.pdf]

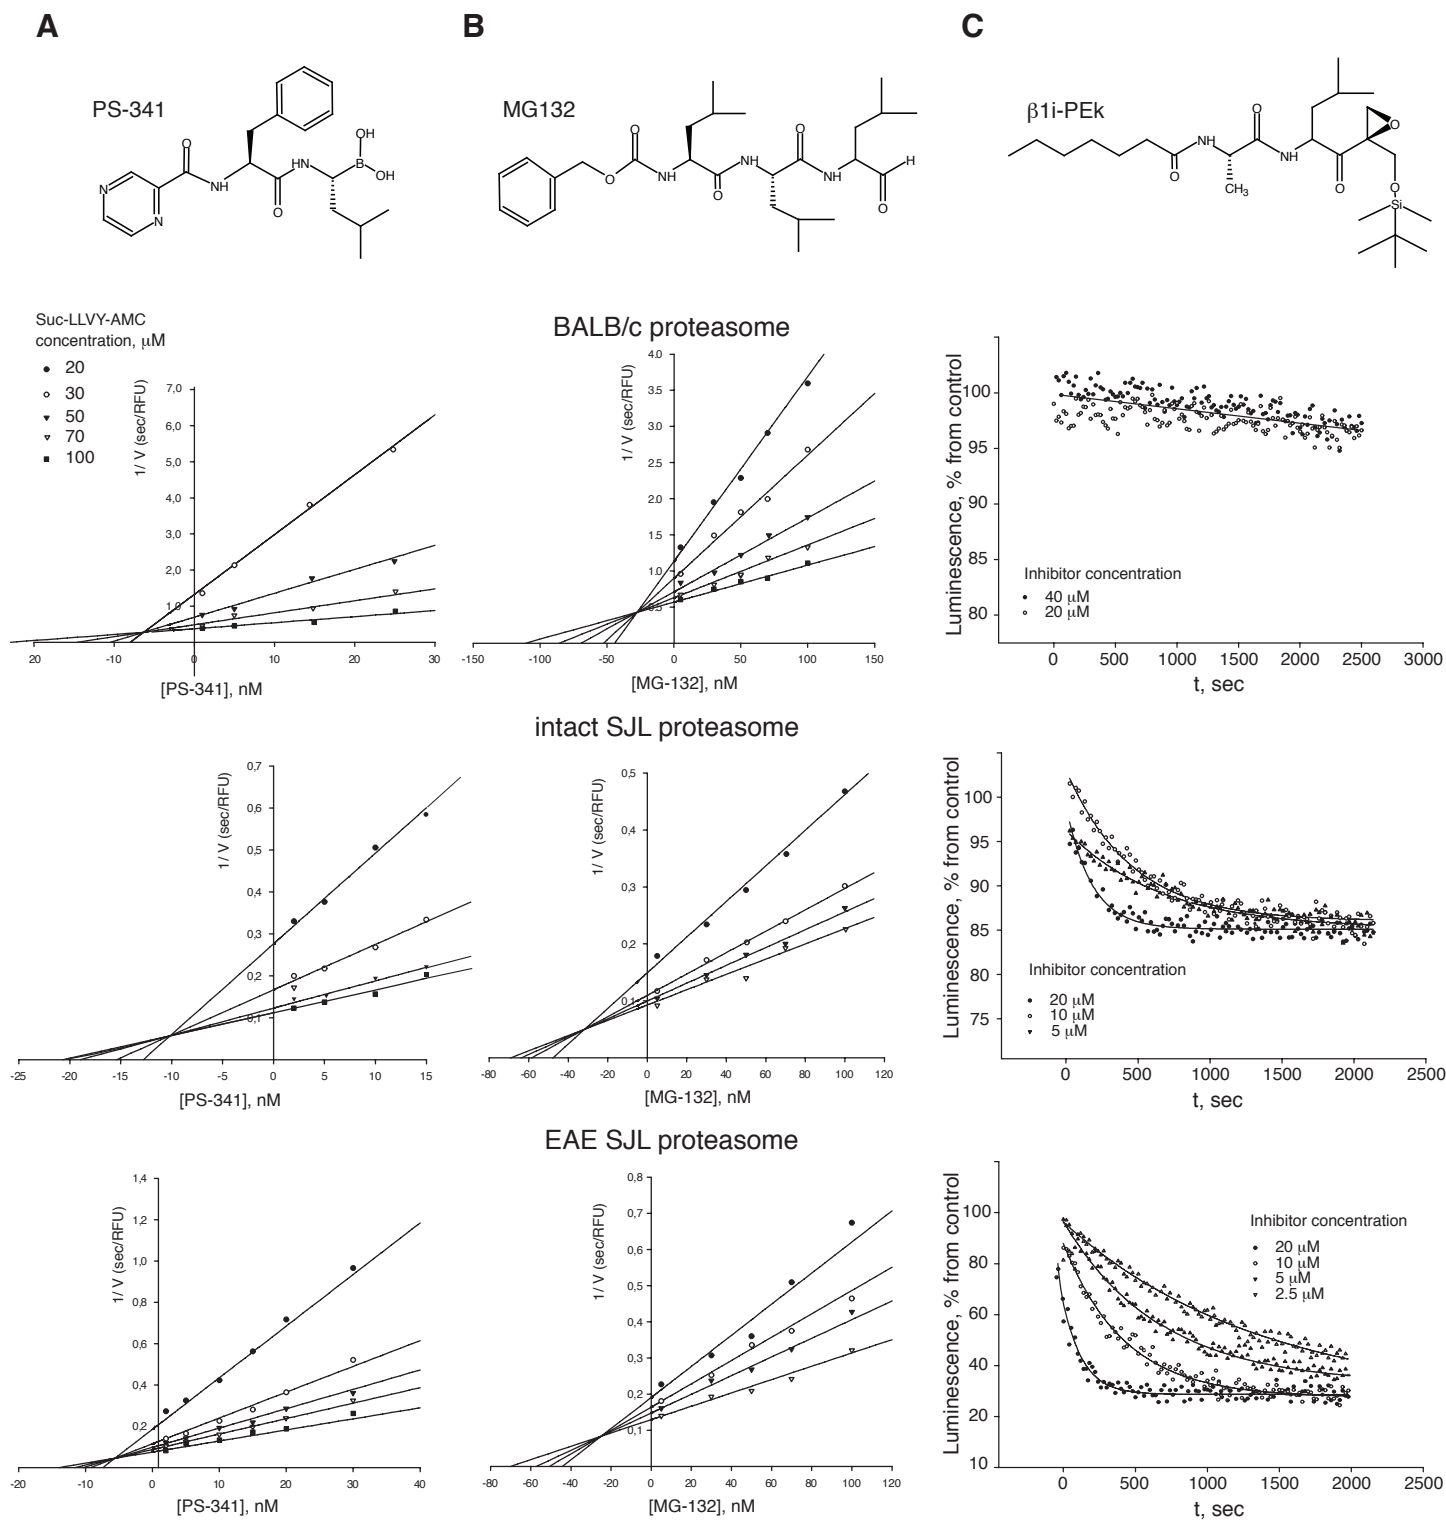

**Figure S4** | Determination of proteasome inhibition constants by PS-341 (A), MG132 (B) and  $\beta\text{1i-PEk}$  (C) from experimental data. Data are the means of three individual experiments where the standard deviation did not exceed ten percent. A time-dependent decrease of peptide substrate hydrolysis velocity after the addition of  $\beta\text{1i-PEk}$  is shown. One representative curve from three independent measurements is shown. Inhibitors were added at different concentrations to proteasomes preincubated with substrate and luminescence of the detection system (which is proportional to the substrate hydrolysis rate) was measured continuously using the Proteasome-Glo™ Chymotrypsine-Like bioluminescent assay system (Promega). The lines drawn through the data are nonlinear least-squares best fits to Eq. 2 (see section materials and methods).
